# Supplementary material
Source: PubMed Central journal article supplement (PMC2799928)

## Supplementary Figure

### **Figure 1: Crosslinking MHC class I does not redistribute PH-GFP or PH-GFP R40L**

T2-Kb cells expressing PH-GFP (A-D) or PH-GFP R40L (E-F) were treated with high-affinity anti-Kb (HB-11) tagged with Cy-3 at 37°C to allow crosslinking of MHC molecules. Cells were fixed and mounted on poly-lysine coverslips, and imaged by Confocal microscopy. Z-stack images show capping of MHC-class I on the surface. Some cells showed no specific recruitment of PH-GFP (examples in A&B), while others showed some inconsistent colocalization (C&D). In E& F, T2-Kb cells expressing PH-GFP were adhered to coverslips pre-coated with antibodies against H2-Kb, (examples in E) or against CD-59 control antigen (examples in F). After 10 minutes at 37°C, cells were fixed and imaged by Confocal microscopy. Imaging the contact surface did not show any specific recruitment or punctate distribution of PH-GFP at the interface. All scale bars represent 10µm.

Supplemental Figure 1  
PH-GFP

HB-11 Cy3

Merge

A

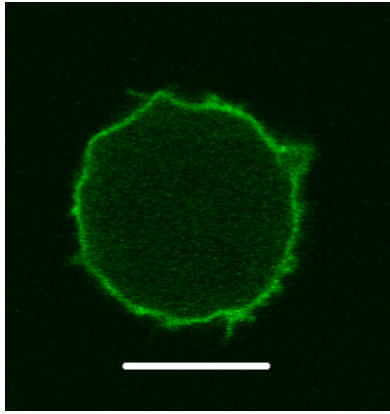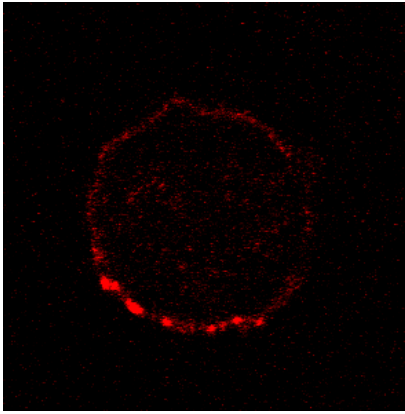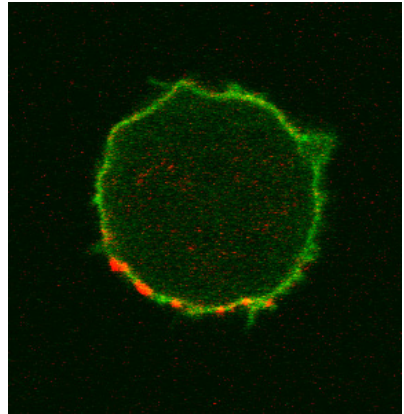

B

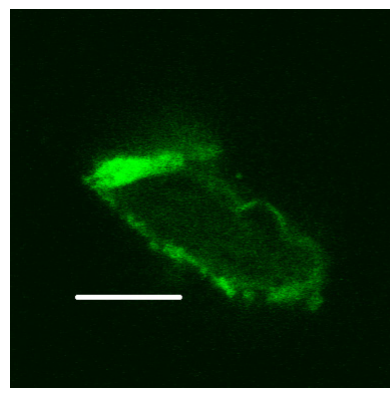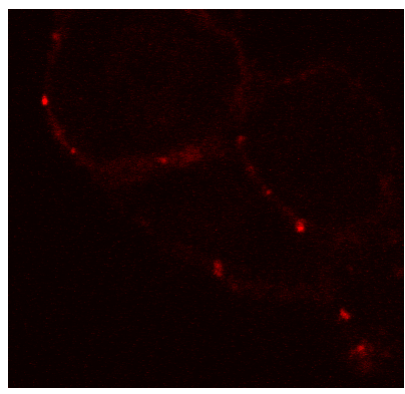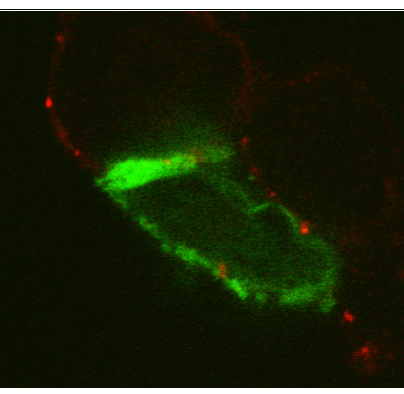

C

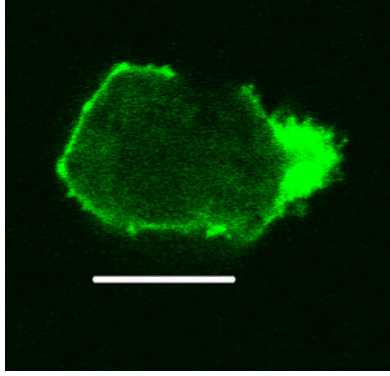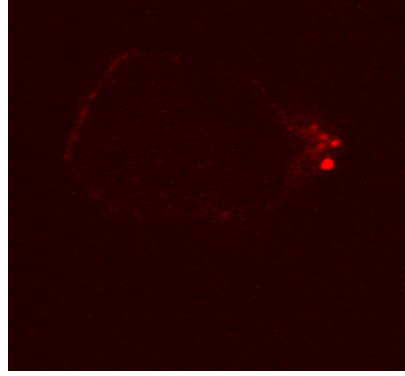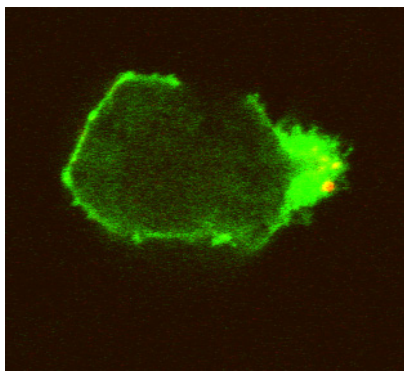

D

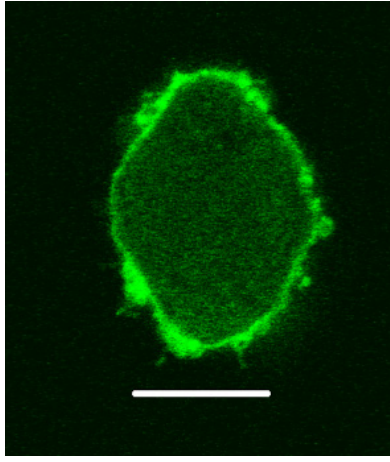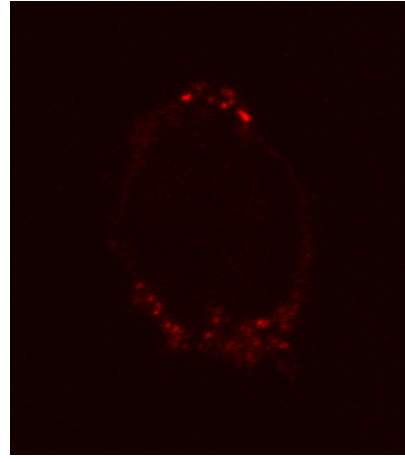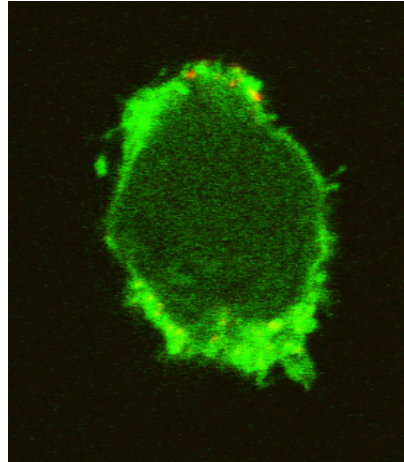

PH-GFP R40L

HB-11 Cy3

Merge

E

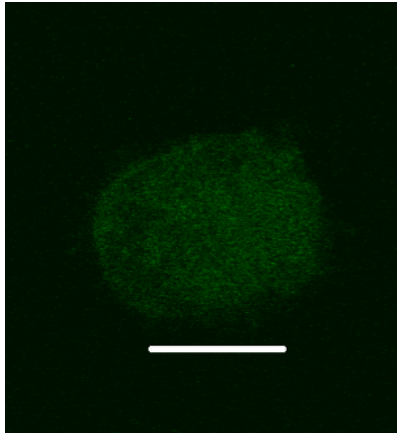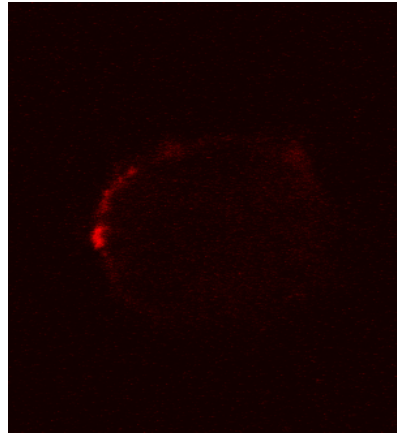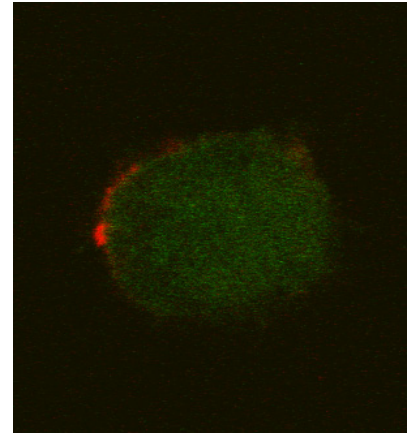

F

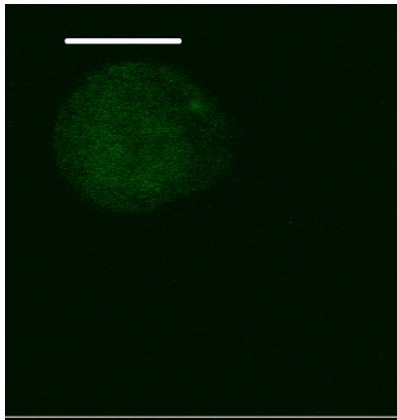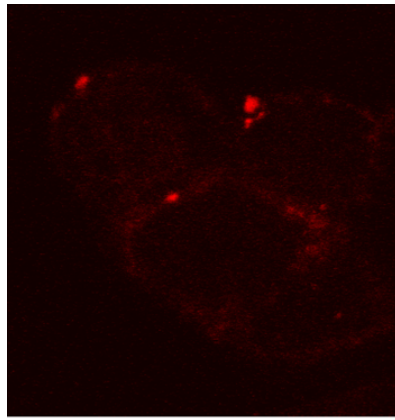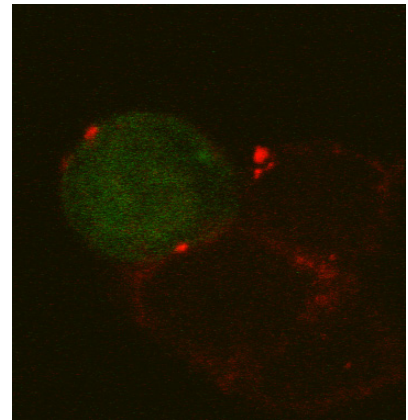

### G. Y3-coated coverslips

PH-GFP

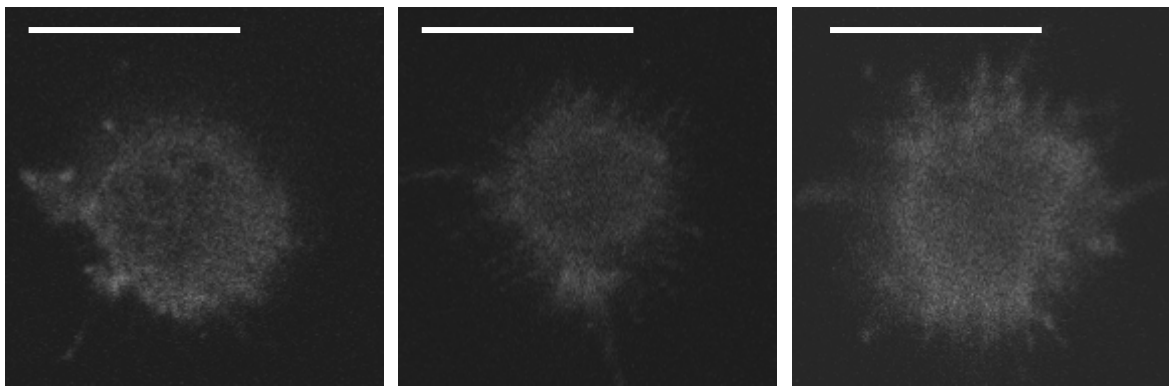

DIC

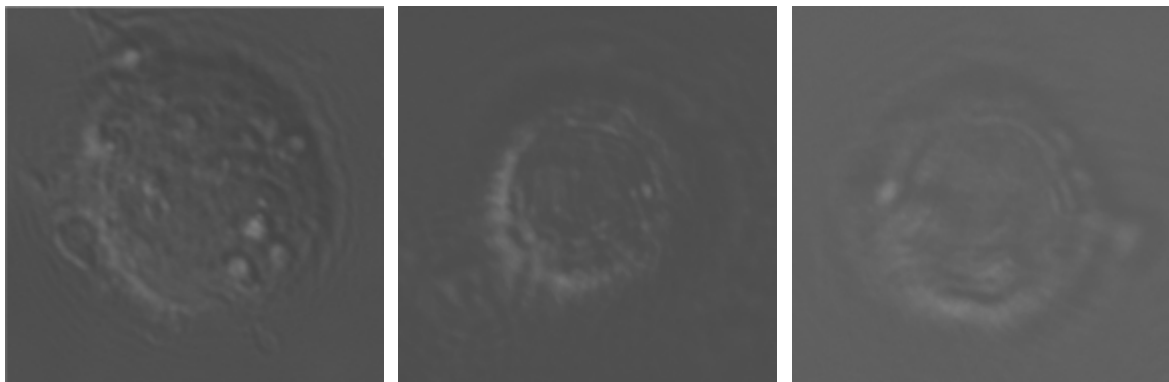

### H. MEM43-coated coverslips

PH-GFP

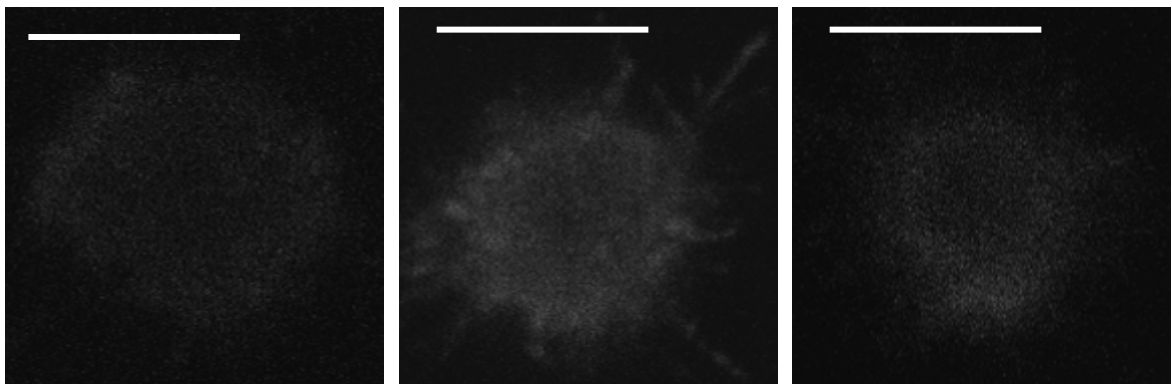

DIC

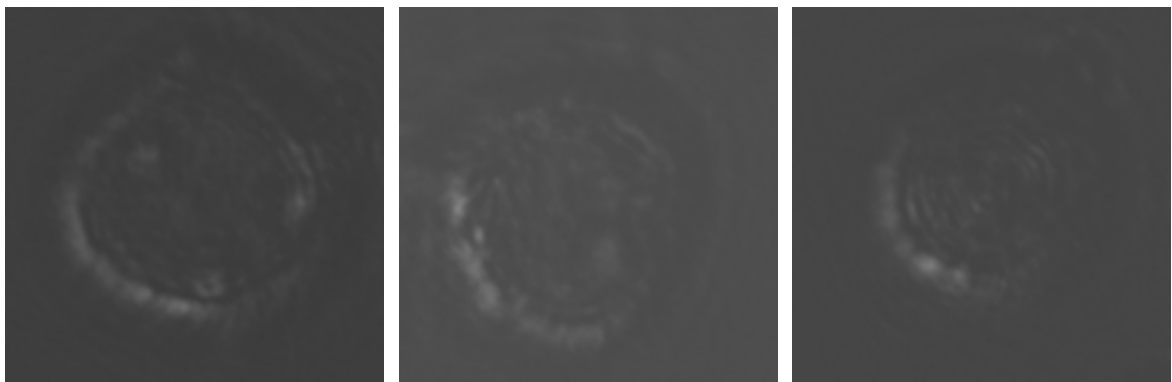

Supplement: NIHMS162591-supplement-montages1.pdf [file NIHMS162591-supplement-montages1.pdf]
